# Supplementary material for: Low ion migration and defect density MAPbX3 single crystals grown at low temperature for X-ray detection
Source: Royal Society of Chemistry journal article supplement (doi:10.1039/d3ta02016a), 2023-01-01
Supplement: d3ta02016a1.pdf [file d3ta02016a1.pdf]

## Supporting Information

### Low Ion Migration and Defect Density MAPbX<sub>3</sub> Single Crystals

#### Grown at Low Temperature for X-Ray Detections

Haibin Li,<sup>a†</sup> Ziming Zhang,<sup>a†</sup> Wei Jiang,<sup>a†</sup> Chen Zhao,<sup>a</sup> Haipeng Di,<sup>a</sup> Jiwei Ren,<sup>a</sup> Bing Ou,<sup>a</sup> Ying Xiong,<sup>b</sup> Feiyi Liao,<sup>\*ab</sup> and Yiying Zhao<sup>\*a</sup>

a. Institute of Materials, China Academy of Engineering Physics, Jianguo, 621908, China.

b. State Key Laboratory for Environment-Friendly Energy Materials, Southwest University of Science & Technology, Mianyang, 621010, China.

\*Corresponding author:

Yiying Zhao zhaoyiying@caep.cn

Feiyi Liao david3349@163.com

†Equal contribution authors

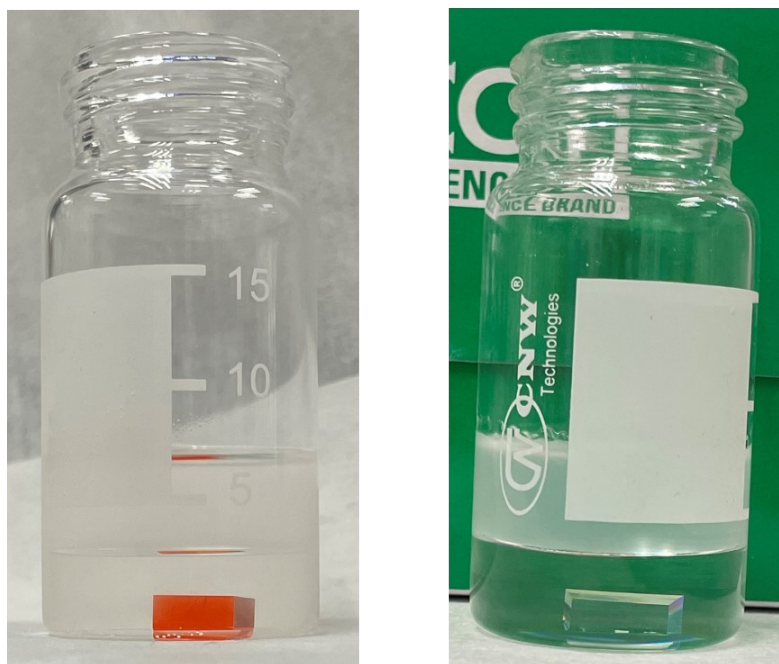

Fig.S1 LT-MAPbBr<sub>3</sub> single crystal in the left bottle and LT-MAPbCl<sub>3</sub> single crystal in the right bottle

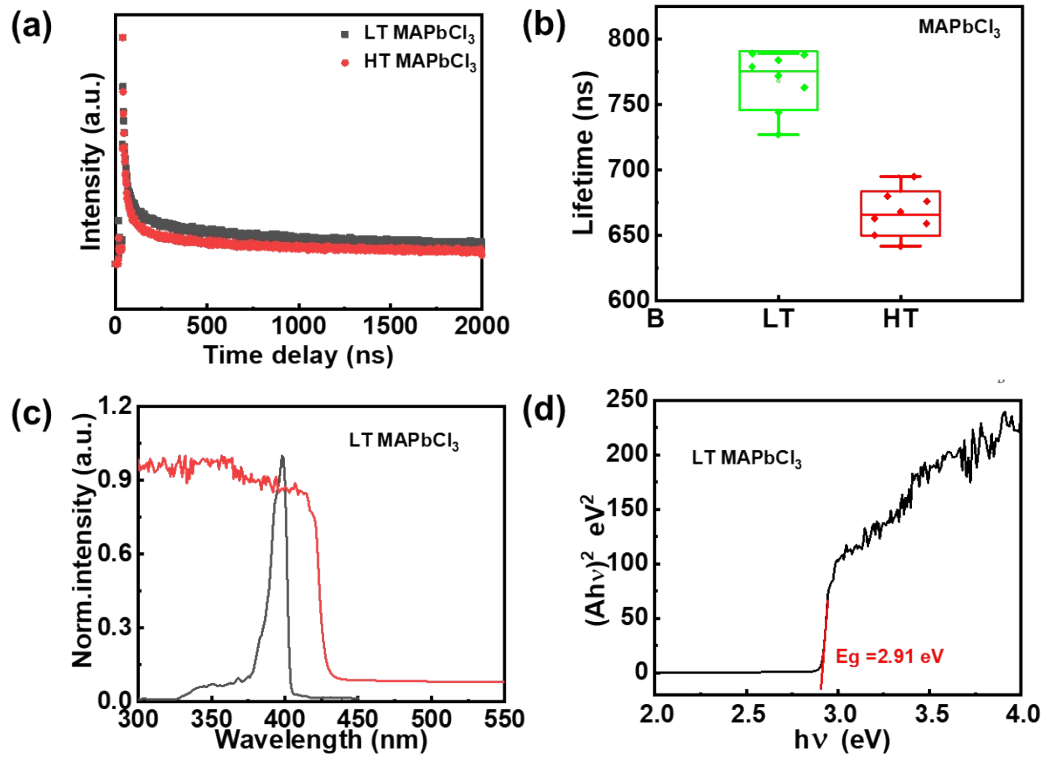

Fig.S2 (a) fluorescence lifetimes of LT-MAPbCl<sub>3</sub> and HT- MAPbCl<sub>3</sub> single crystals; (b) Statistical distribution comparison of the fluorescence lifetimes of LT-MAPbCl<sub>3</sub> and HT-MAPbCl<sub>3</sub> PSCs; (c) PL spectrum and UV-Vis absorption spectrum of LT-MAPbCl<sub>3</sub> PSCs; (d) E<sub>g</sub> of LT-MAPbCl<sub>3</sub> PSCs.

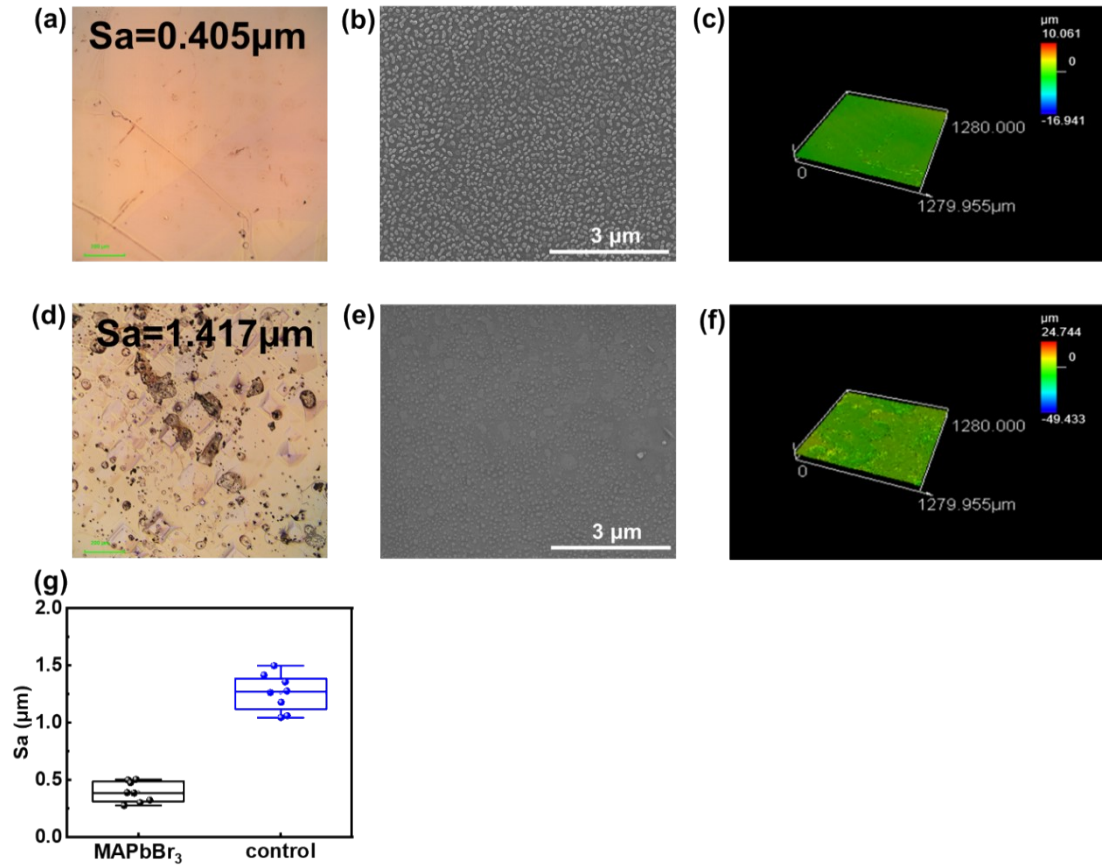

Fig.S3. (a) Confocal microscope image, (b) SEM image, and (c) 3D-Confocal microscope image of LT-MAPbBr<sub>3</sub> PSCs; (d) Confocal microscope image, (e) SEM image, and (f) 3D-Confocal microscope image of HT-MAPbBr<sub>3</sub> PSCs; (g) Statistical distribution comparison of the Surface roughness of LT-MAPbBr<sub>3</sub> and HT-MAPbBr<sub>3</sub> PSCs.

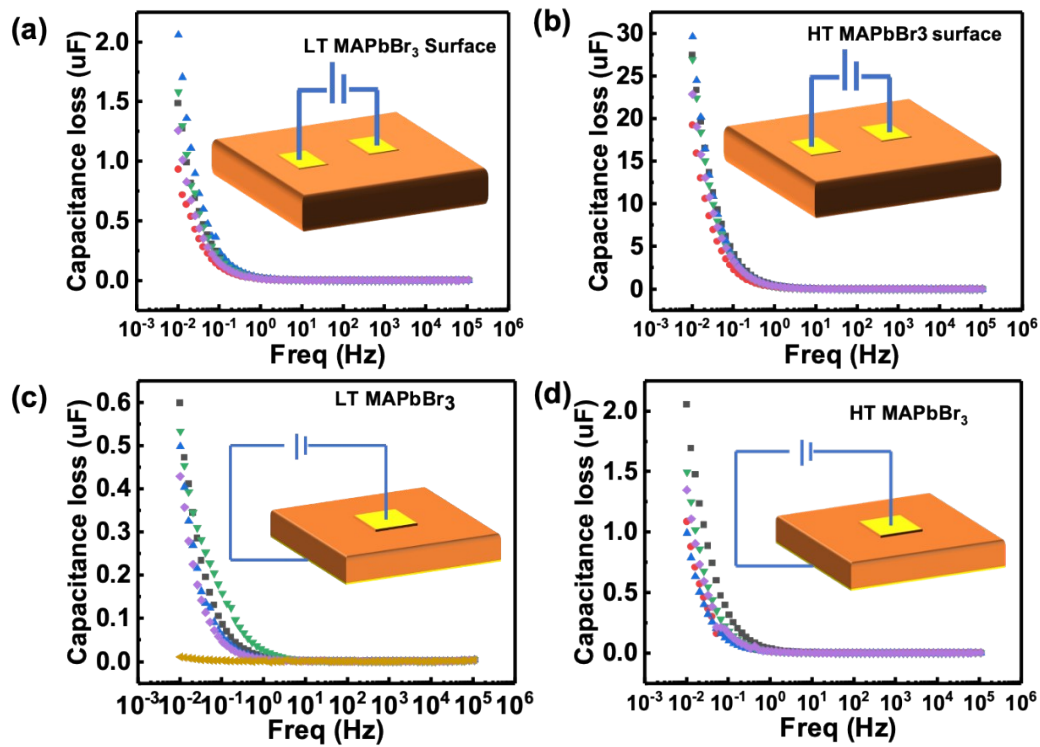

Fig.S4 Surface capacitance loss in the planar direction of (a) LT-MAPbBr<sub>3</sub> PSCs and (b) HT-MAPbBr<sub>3</sub> PSCs; bulk phase capacitance loss of (c) LT-MAPbBr<sub>3</sub> PSCs and (d) HT-MAPbBr<sub>3</sub> PSCs.

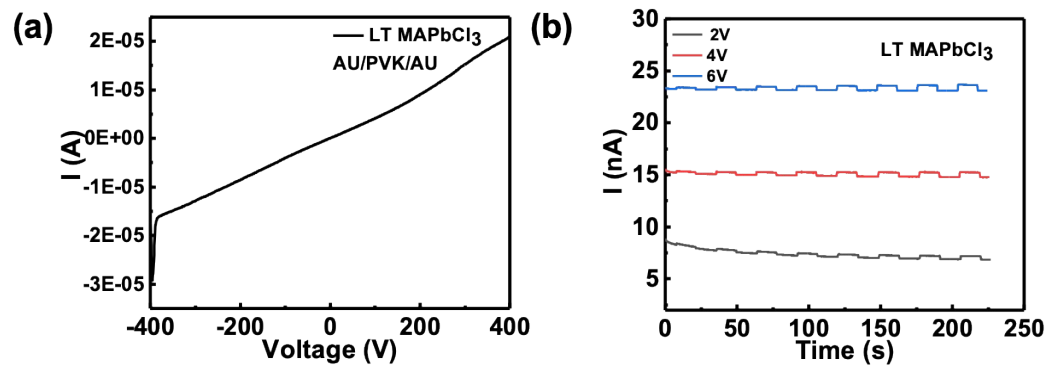

Fig.S5 (a) dark current-voltage characteristics of LT-MAPbCl<sub>3</sub> PSCs, (b) On-off photocurrent response of LT-MAPbCl<sub>3</sub> X-ray detectors under different dose rates at different bias of -2 V, -4 V, -6 V, respectively.

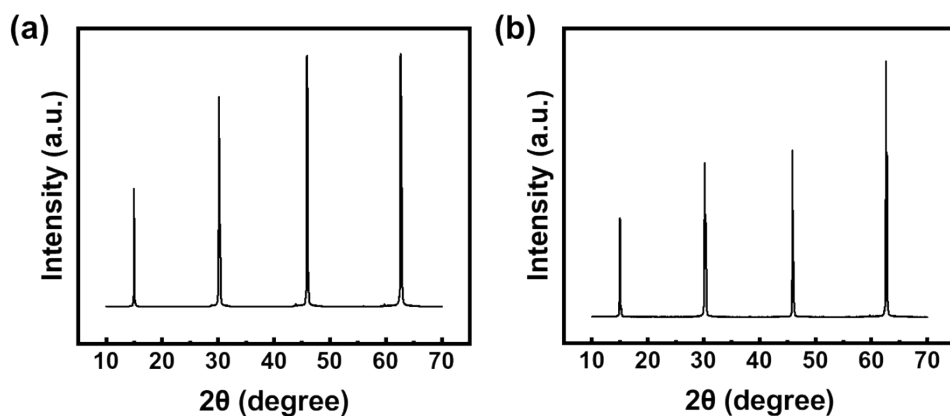

Fig.S6 XRD patterns of MAPbBr<sub>3</sub> crystals grown using LT-LDSC method (a) fresh crystal (b) crystal after six months since fabricated.

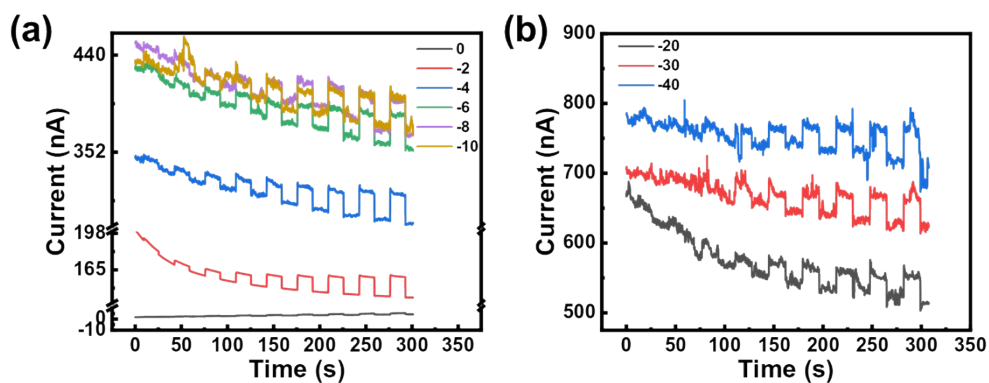

Fig.S7 On-off photocurrent response of LT-MAPbBr<sub>3</sub> PSCs after six months since fabricated under different dose rates at bias of (a) 0, -2 V, -4 V, -6 V, -8 V, -10 V and (b) -20 V, -30 V and -40 V, respectively;

**Table S1.** Summary of MAPbBr<sub>3</sub> PSC properties and device performances of resulting X-ray detectors in published representative work

| Ref. | FWHM of Rocking curve (°)  | E <sub>g</sub> (eV) | PL Peak (nm) | $\tau$ (ns) | n <sub>trap</sub> (x10 <sup>9</sup> cm <sup>-3</sup> ) | Mobility (cm <sup>2</sup> V <sup>-1</sup> s <sup>-1</sup> ) | Lowest detectable dose rate ( $\mu$ Gy·S <sup>-1</sup> ) | Sensitivity ( $\mu$ C Gy <sup>-1</sup> cm <sup>-2</sup> ) |
|------|----------------------------|---------------------|--------------|-------------|--------------------------------------------------------|-------------------------------------------------------------|----------------------------------------------------------|-----------------------------------------------------------|
| 1    | 0.0183(001)<br>0.0173(002) | 2.15                | 577          | 235         | e : 27 ± 2<br>h : 22 ± 1                               | /                                                           | /                                                        | 39.3                                                      |
| 1    | 0.0163(001)<br>0.0096(002) | 2.15                | 577          | 997         | e : 6.5 ± 0.4<br>h : 4.4 ± 0.2                         | /                                                           | 1.2                                                      | 184.6                                                     |
| 2    | /                          | /                   | /            | /           | h : 5.64                                               | 27.5                                                        | 7.5                                                      | 307                                                       |
| 3    | /                          | /                   | /            | 692         | /                                                      | 201                                                         | 0.1                                                      | 2.1x10 <sup>4</sup>                                       |
| 4    | /                          | /                   | 550          | /           | /                                                      | 217                                                         | 0.5                                                      | 80                                                        |
| 5    | 0.009(001)                 | /                   | 533          | 44.8<br>7   | /                                                      | /                                                           | 0.087                                                    | 1.5 x10 <sup>4</sup>                                      |
| 6    | /                          | 2.16                | /            | 17.1<br>4   | h:16.9                                                 | 60                                                          | /                                                        | 632                                                       |
| 7    | 0.017(001)                 | /                   | /            | 103.<br>73  | /                                                      | /                                                           | /                                                        | 426.43                                                    |

1. Yao, F.; Peng, J.; Li, R.; Li, W.; Gui, P.; Li, B.; Liu, C.; Tao, C.; Lin, Q.; Fang, G., Room-temperature liquid diffused separation induced crystallization for high-quality perovskite single crystals. *Nat Commun* **2020**, *11* (1), 1194.
2. Wang, X.; Zhao, D.; Qiu, Y.; Huang, Y.; Wu, Y.; Li, G.; Huang, Q.; Khan, Q.; Nathan, A.; Lei, W.; Chen, J., PIN Diodes Array Made of Perovskite Single Crystal for X-Ray Imaging. *physica status solidi (RRL) - Rapid Research Letters* **2018**, *12* (10).
3. Wei, W.; Zhang, Y.; Xu, Q.; Wei, H.; Fang, Y.; Wang, Q.; Deng, Y.; Li, T.; Gruverman, A.; Cao, L.; Huang, J., Monolithic integration of hybrid perovskite single crystals with heterogenous substrate for highly sensitive X-ray imaging. *Nat Photonics* **2017**, *11* (5), 315-321.
4. Wei, H.; Fang, Y.; Mulligan, P.; Chuirazzi, W.; Fang, H.-H.; Wang, C.; Ecker, B. R.; Gao, Y.; Loi, M. A.; Cao, L.; Huang, J., Sensitive X-ray detectors made of methylammonium lead tribromide perovskite single crystals. *Nat Photonics* **2016**, *10* (5), 333-339.
5. Chen, L.; Wang, H.; Zhang, W.; Li, F.; Wang, Z.; Wang, X.; Shao, Y.; Shao, J., Surface Passivation of MAPbBr<sub>3</sub> Perovskite Single Crystals to Suppress Ion Migration and Enhance Photoelectronic Performance. *ACS Appl Mater Interfaces* **2022**, *14* (8), 10917-10926.

6. Feng, A.; Xie, S.; Fu, X.; Chen, Z.; Zhu, W., Inch-Sized Thin Metal Halide Perovskite Single-Crystal Wafers for Sensitive X-Ray Detection. *Front Chem* **2021**, *9*, 823868.
7. Zhang, L.; Cui, S.; Guo, Q.; Ge, C.; Han, Q.; Lin, Q.; Li, C.; Zheng, X.; Zhai, Z.; Wang, L.; Sun, Q.; Xu, Y.; Liu, Y.; Tao, X., Anisotropic Performance of High-Quality MAPbBr<sub>3</sub> Single-Crystal Wafers. *ACS Appl Mater Interfaces* **2020**, *12* (46), 51616-51627.
